# Supplementary material for: Association of asthma and bronchiectasis: Mendelian randomization analyses and observational study
Source: PubMed Central journal article supplement — Respir Res. 2024 Nov 20;25:413. doi: 10.1186/s12931-024-03034-3 (PMC11580211; doi:10.1186/s12931-024-03034-3), 2024-11-20

| method                                    | nsnp | OR (95% CI)        | P value |
|-------------------------------------------|------|--------------------|---------|
| Inverse variance weighted                 | 36   | 1.619(1.310-2.000) | <0.001  |
| MR Egger                                  | 36   | 2.325(1.169-4.626) | 0.022   |
| Weighted median                           | 36   | 1.630(1.243-2.137) | <0.001  |
| Weighted mode                             | 36   | 1.628(1.063-2.492) | 0.031   |
| Contamination mixture method              | 36   | 1.891(1.380-2.591) | 0.001   |
| Robust adjusted profile score (RAPS)      | 36   | 1.620(1.278-2.054) | <0.001  |
| Debiased inverse-variance weighted method | 36   | 1.632(1.317-2.023) | <0.001  |
| Constrained maximum likelihood            | 36   | 1.608(1.314-1.968) | <0.001  |
| Bayesian Weighted Mendelian Randomization | 36   | 1.637(1.317-2.036) | <0.001  |

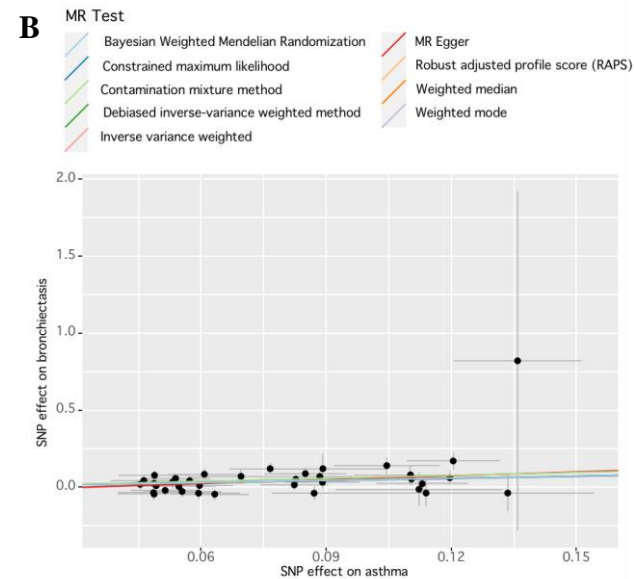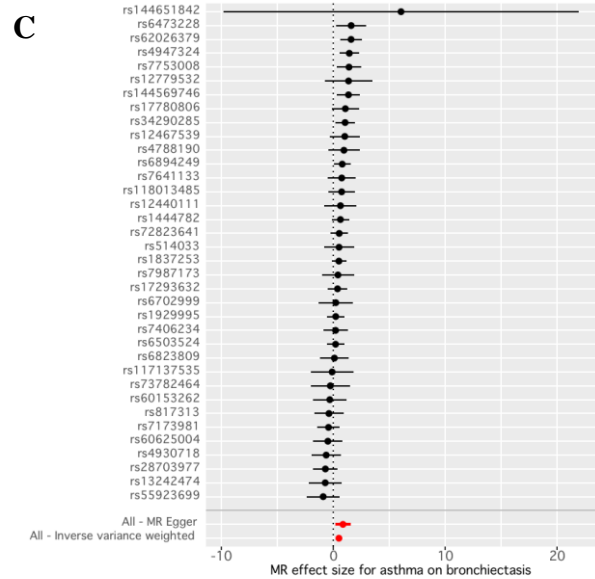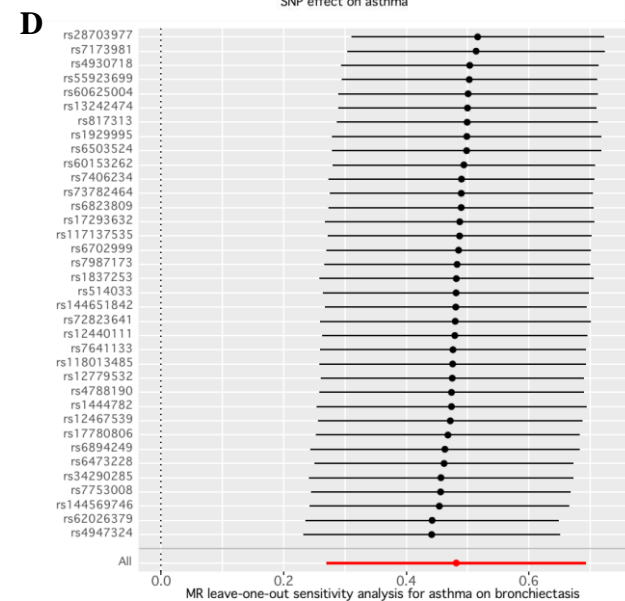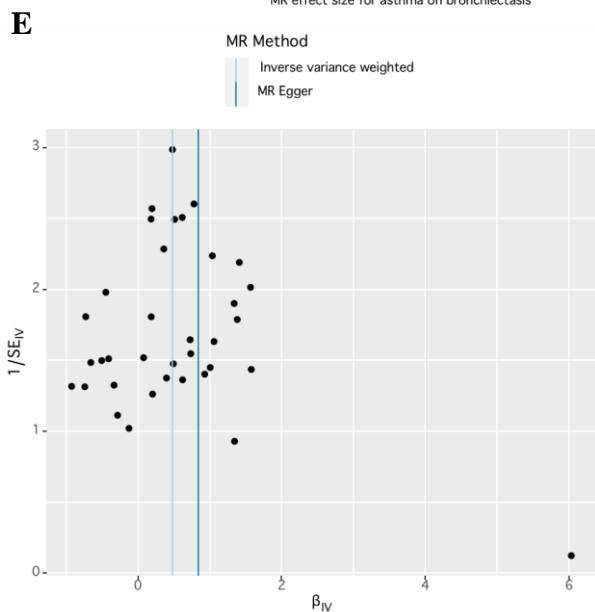

Supplement: 12931_2024_3034_MOESM2_ESM.pdf [file 12931_2024_3034_MOESM2_ESM.pdf]
