# Supplementary material for: Association of asthma and bronchiectasis: Mendelian randomization analyses and observational study
Source: PubMed Central journal article supplement — Respir Res. 2024 Nov 20;25:413. doi: 10.1186/s12931-024-03034-3 (PMC11580211; doi:10.1186/s12931-024-03034-3), 2024-11-20

| method                                    | nsnp | OR (95% CI)        | P value |
|-------------------------------------------|------|--------------------|---------|
| Inverse variance weighted                 | 7    | 1.007(0.961-1.054) | 0.772   |
| MR Egger                                  | 7    | 0.977(0.887-1.077) | 0.658   |
| Weighted median                           | 7    | 0.999(0.948-1.053) | 0.974   |
| Weighted mode                             | 7    | 0.991(0.926-1.060) | 0.797   |
| Contamination mixture method              | 7    | 0.979(0.931-1.029) | 0.386   |
| Robust adjusted profile score (RAPS)      | 7    | 0.995(0.956-1.036) | 0.820   |
| Debiased inverse-variance weighted method | 7    | 1.007(0.962-1.054) | 0.759   |
| Constrained maximum likelihood            | 7    | 1.003(0.960-1.049) | 0.878   |
| Bayesian Weighted Mendelian Randomization | 7    | 0.998(0.949-1.048) | 0.923   |

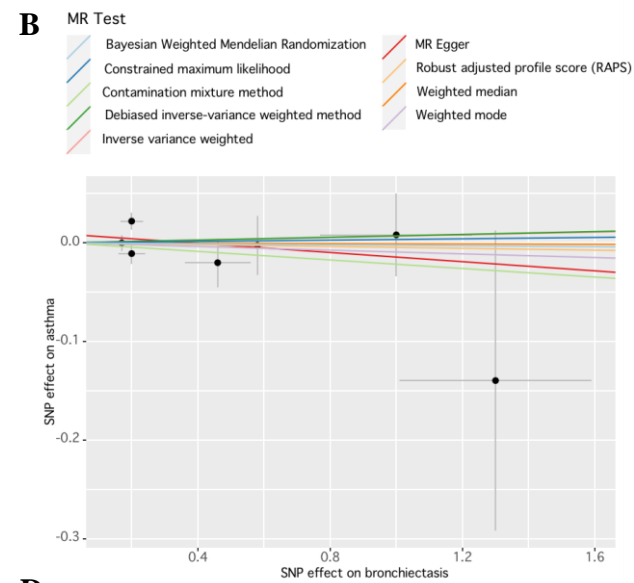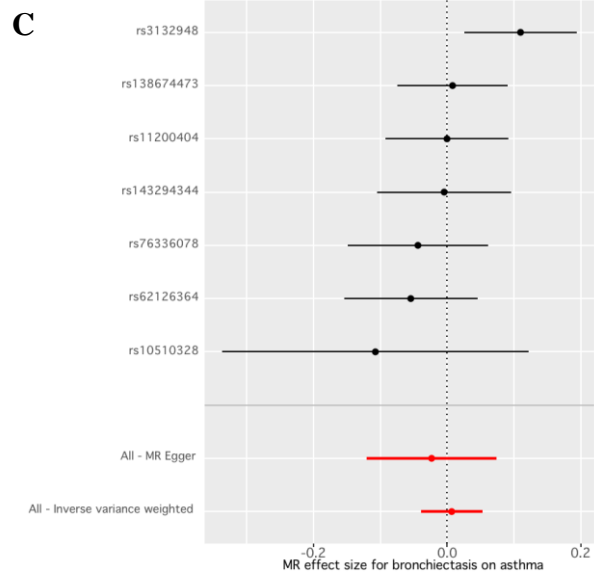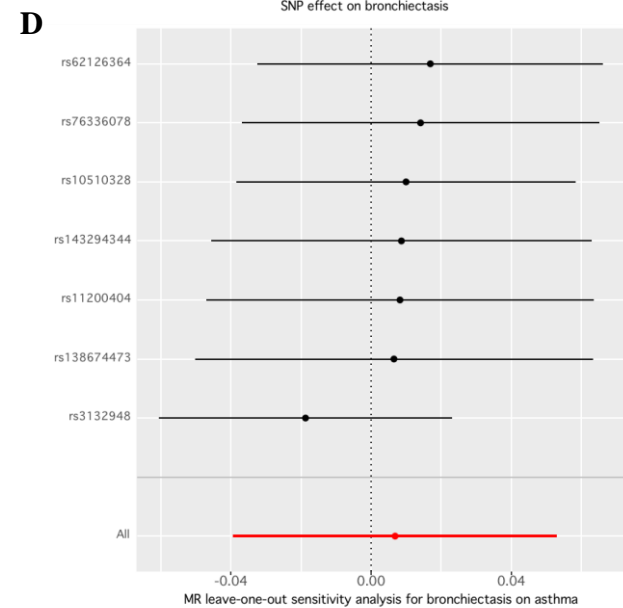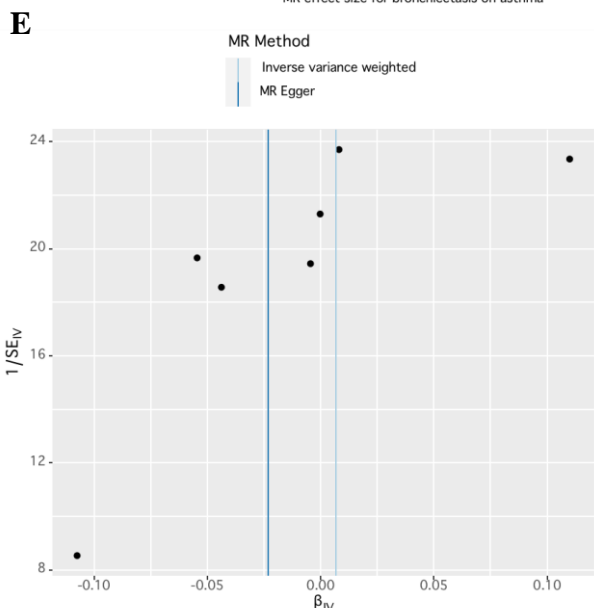

Supplement: 12931_2024_3034_MOESM4_ESM.pdf [file 12931_2024_3034_MOESM4_ESM.pdf]
