# Supplementary figures and images for: Association of asthma and bronchiectasis: Mendelian randomization analyses and observational study
Source: PubMed Central journal article supplement — Respir Res. 2024 Nov 20;25:413. doi: 10.1186/s12931-024-03034-3 (PMC11580211; doi:10.1186/s12931-024-03034-3), 2024-11-20

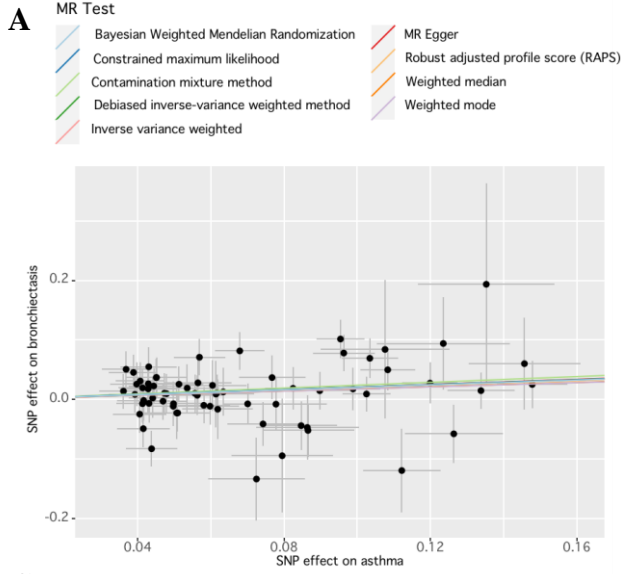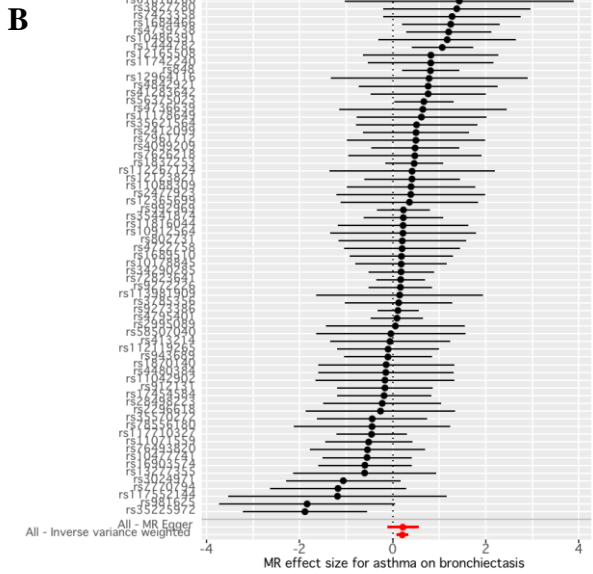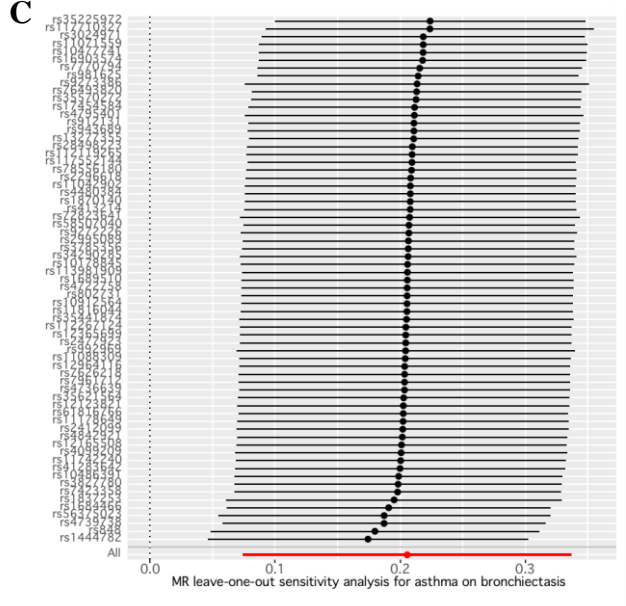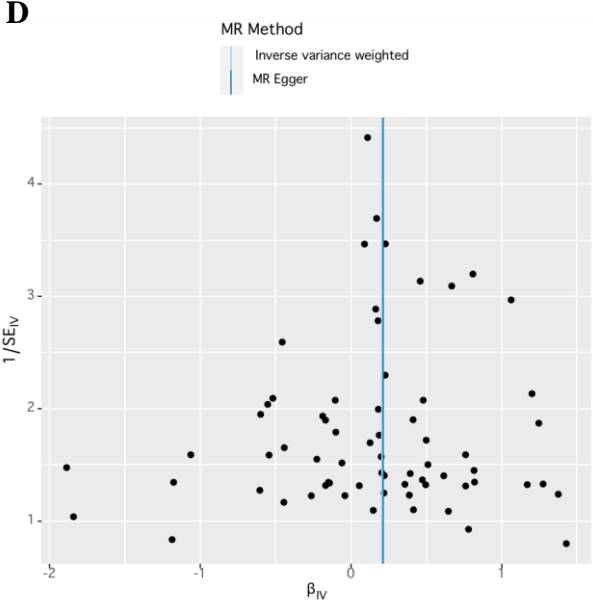

Supplement: 12931_2024_3034_MOESM1_ESM.pdf [file 12931_2024_3034_MOESM1_ESM.pdf]

**A**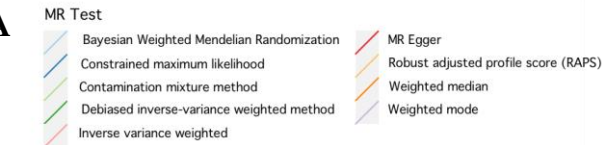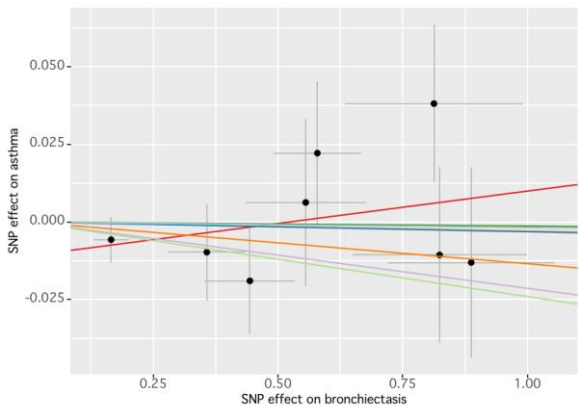**B**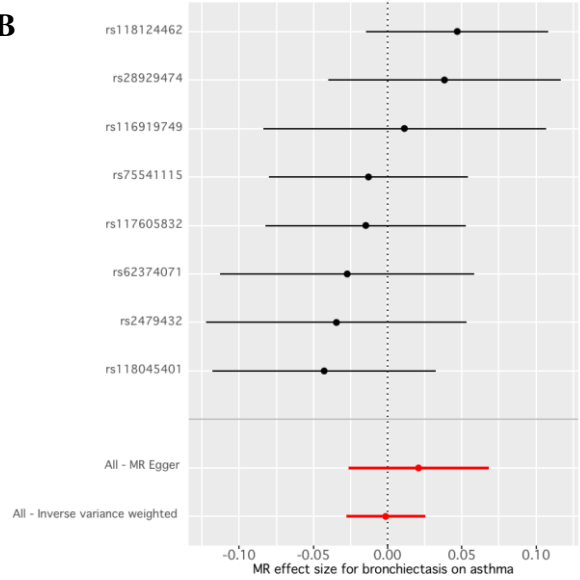**C**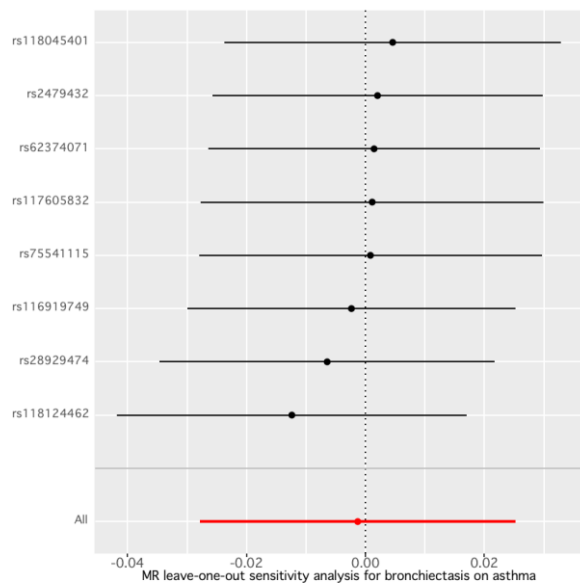**D**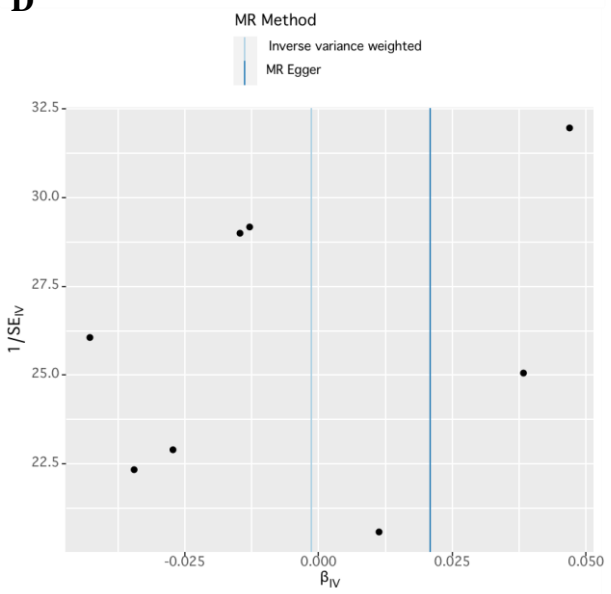

Supplement: 12931_2024_3034_MOESM3_ESM.pdf [file 12931_2024_3034_MOESM3_ESM.pdf]

**A**

| mediator         | OR (95% CI)        | P value | Mediation proportion (%) |
|------------------|--------------------|---------|--------------------------|
| Neutrophil count | 1.000(0.996-1.004) | 0.934   | -1.888                   |

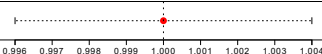**B**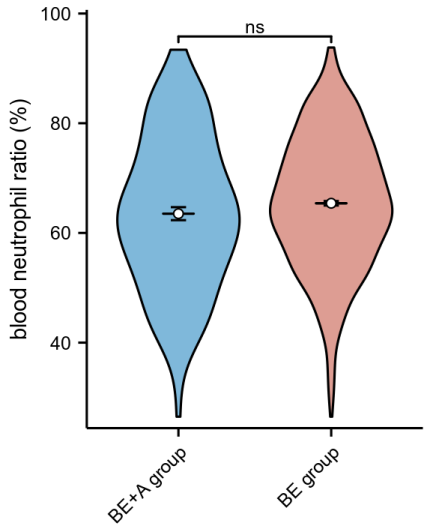**C**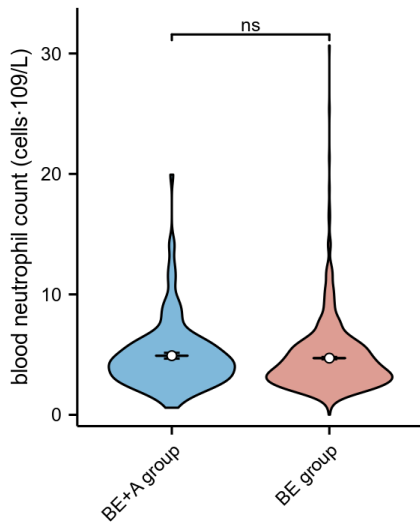

Supplement: 12931_2024_3034_MOESM5_ESM.pdf [file 12931_2024_3034_MOESM5_ESM.pdf]
